# Supplementary material
Source: PubMed Central journal article supplement (PMC3434232)
Supplement: NIHMS382790-supplement-1.pdf [file NIHMS382790-supplement-1.pdf]

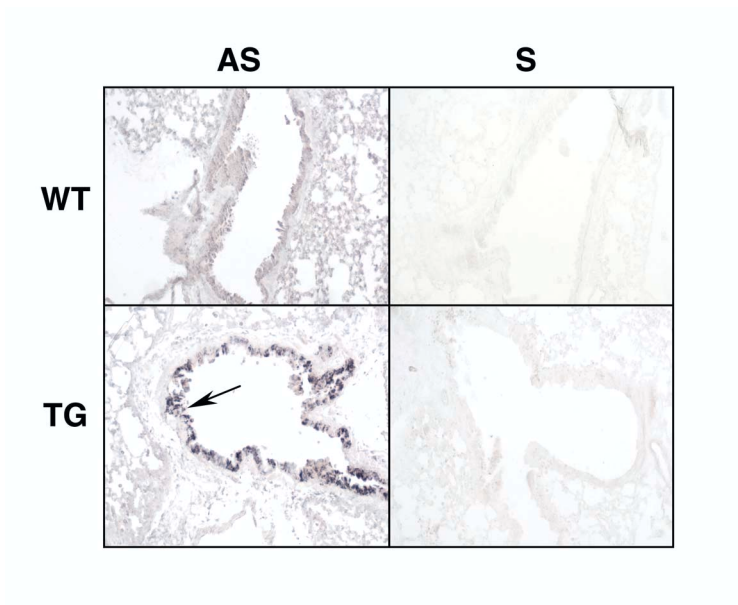

**Figure 1.** Localization of Gob-5 mRNA expression by RNA *in situ* hybridization. Arrow indicates Gob-5 positive signals in airway epithelial cells. S, sense; AS, antisense (10X).
