# Supplementary material
Source: PubMed Central journal article supplement (PMC3434232)
Supplement: NIHMS382790-supplement-2.pdf [file NIHMS382790-supplement-2.pdf]

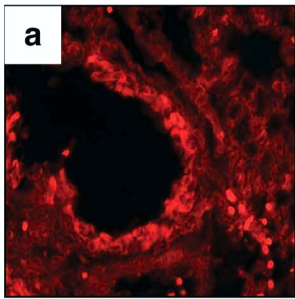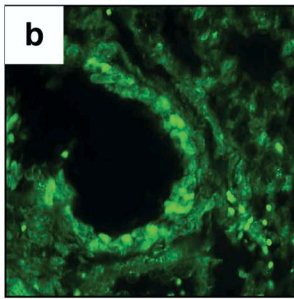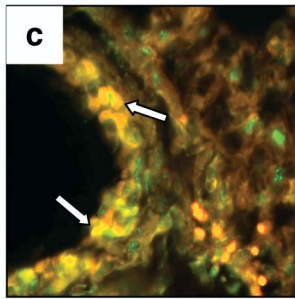

**Figure 2.** Localization of VEGF expression in epithelial cells of OVA sensitized and challenged mice. Fluorescent immunohistochemistry was used to identify the location of CC10 (red, panels a and c) and VEGF (green, panels b and c). Double immunohistochemistry is illustrated in panel c. VEGF was expressed in most of the CC10 (+) cells (yellow, arrows) and also in cells that did not express CC10 (green only) (a and b, 40X; c, 60X).
