# Supplementary material
Source: PubMed Central journal article supplement (PMC3434232)
Supplement: NIHMS382790-supplement-3.pdf [file NIHMS382790-supplement-3.pdf]

**a**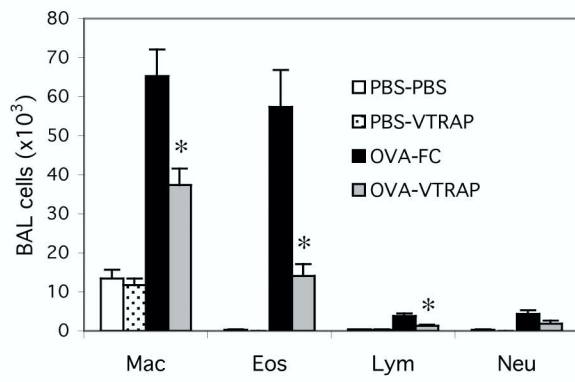**b**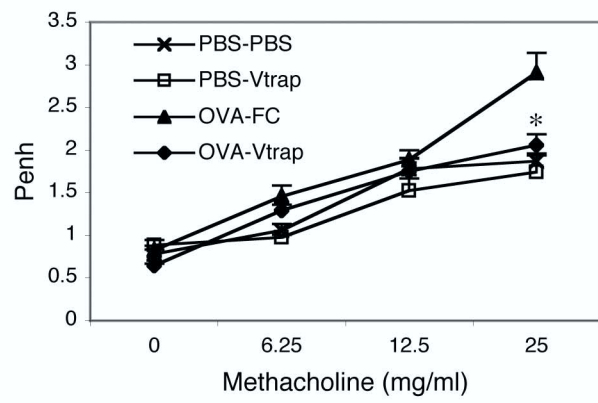**c**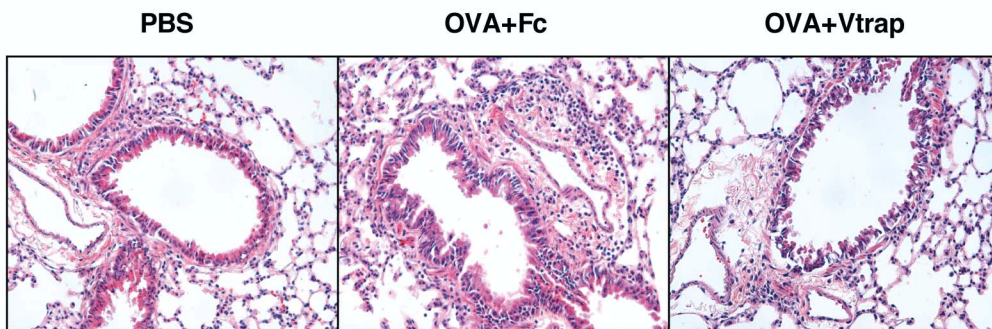

**Figure 3.** Role of VEGF in Th2 inflammation. WT mice were sensitized and boosted with OVA and alum. They were then challenged with OVA in the presence and absence of VEGF<sub>R1R2</sub> Trap (Vtrap) or control antibody. In panel a, BAL cell recovery was quantitated. Each value represents the mean  $\pm$  SEM of a minimum of 8 animals. In panels b and c, we compare the methacholine responsiveness (b) and tissue histology (H&E stain; 10X) (c) of sensitized mice that received vehicle or OVA in the presence or absence of Vtrap or its control antibody (Fc). In panels a and b, \* $P$ <0.01 vs. OVA challenged mice in the absence of inhibitor.
