# Supplementary material
Source: PubMed Central journal article supplement (PMC3434232)
Supplement: NIHMS382790-supplement-4.pdf [file NIHMS382790-supplement-4.pdf]

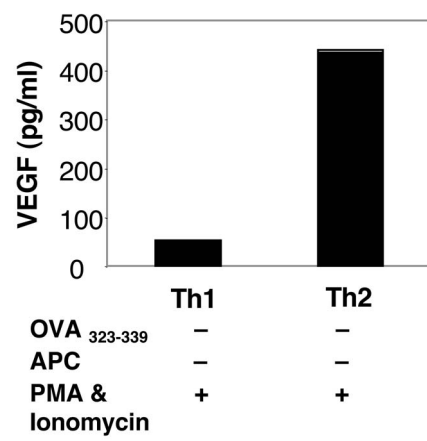

**Figure 4.** VEGF expression of Th1 and Th2 cells in the absence of antigen presenting cells (APC). Th1 and Th2 cells were generated as described in the text. The cells were then restimulated with phorbol (PMA) and ionomycin and supernatant VEGF levels were measured by ELISA. The noted experiment is representative of  $n = 4$ .
